# Supplementary material
Source: PubMed Central journal article supplement (PMC4288692)

**Table S1: Plasmids**

| Plasmid  | Genotype                                       |                                           |
|----------|------------------------------------------------|-------------------------------------------|
| pAC225   | <i>cat amp</i>                                 | (Gift of Amy Camp, Mount Holyoke College) |
| pDG1515  | <i>tet amp</i>                                 | (36)                                      |
| pDG780   | <i>kan amp</i>                                 | (36)                                      |
| pDP155   | <i>amyE::P<sub>hag</sub>-GFP cat amp</i>       |                                           |
| pDP242   | $\Delta$ <i>swrB mls amp</i>                   |                                           |
| pDP266   | <i>6His-SUMO-FlgM amp</i>                      |                                           |
| pDP305   | $\Delta$ <i>flgB mls amp</i>                   |                                           |
| pDP306   | $\Delta$ <i>flgE mls amp</i>                   |                                           |
| pDP311   | $\Delta$ <i>bpr mls amp</i>                    |                                           |
| pDP312   | $\Delta$ <i>vpr mls amp</i>                    |                                           |
| pDP313   | $\Delta$ <i>nprE mls amp</i>                   |                                           |
| pDP314   | $\Delta$ <i>aprE mls amp</i>                   |                                           |
| pDP315   | $\Delta$ <i>epr mls amp</i>                    |                                           |
| pDP317   | $\Delta$ <i>wprA mls amp</i>                   |                                           |
| pDP320   | $\Delta$ <i>mpr mls amp</i>                    |                                           |
| pDP326   | $\Delta$ <i>sigD mls amp</i>                   |                                           |
| pDP327   | $\Delta$ <i>ylxF mls amp</i>                   |                                           |
| pDP328   | $\Delta$ <i>flgD mls amp</i>                   |                                           |
| pDP329   | $\Delta$ <i>ylzI mls amp</i>                   |                                           |
| pDP330   | $\Delta$ <i>fliL mls amp</i>                   |                                           |
| pDP332   | $\Delta$ <i>fliO mls amp</i>                   |                                           |
| pDP333   | $\Delta$ <i>flhF mls amp</i>                   |                                           |
| pDP335   | $\Delta$ <i>fliH mls amp</i>                   |                                           |
| pDP336   | $\Delta$ <i>fliI mls amp</i>                   |                                           |
| pDP338   | $\Delta$ <i>cheA mls amp</i>                   |                                           |
| pDP340   | $\Delta$ <i>cheC mls amp</i>                   |                                           |
| pDP341   | $\Delta$ <i>cheD mls amp</i>                   |                                           |
| pDP342   | $\Delta$ <i>cheW mls amp</i>                   |                                           |
| pDP343   | $\Delta$ <i>cheY mls amp</i>                   |                                           |
| pDP344   | $\Delta$ <i>cheB mls amp</i>                   |                                           |
| pDP345   | $\Delta$ <i>fliQ mls amp</i>                   |                                           |
| pDP346   | $\Delta$ <i>fliP mls amp</i>                   |                                           |
| pDP347   | $\Delta$ <i>flhB mls amp</i>                   |                                           |
| pDP349   | $\Delta$ <i>flgC mls amp</i>                   |                                           |
| pDP350   | $\Delta$ <i>fliE mls amp</i>                   |                                           |
| pDP351   | $\Delta$ <i>fliR mls amp</i>                   |                                           |
| pDR111   | <i>amyE::Physpank spec amp</i>                 | (37)                                      |
| pKB40    | $\Delta$ <i>fliG mls amp</i>                   |                                           |
| pKB93    | $\Delta$ <i>fliK mls amp</i>                   |                                           |
| pLC16    | $\Delta$ <i>fliF mls amp</i>                   |                                           |
| pLC22    | $\Delta$ <i>flhG mls amp</i>                   |                                           |
| pLC25    | $\Delta$ <i>fliJ mls amp</i>                   |                                           |
| pLC47    | $\Delta$ <i>flhA mls amp</i>                   |                                           |
| pMiniMAD | <i>ori<sup>BSTs</sup> amp mls</i>              | (35)                                      |
| pMP50    | $\Delta$ <i>comI mls amp</i>                   |                                           |
| pRC21    | <i>amyE::P<sub>hyspank</sub>-flgM spec amp</i> |                                           |
| pRC62    | $\Delta$ <i>swrB mls amp</i>                   |                                           |
| pSG32    | $\Delta$ <i>fliM mls amp</i>                   |                                           |
| pSG6     | $\Delta$ <i>fliY mls amp</i>                   |                                           |
| pTB146   | <i>6His-SUMO amp</i>                           | (38)                                      |

**Table S2: Primers**

| Primer | Sequence                                                    |
|--------|-------------------------------------------------------------|
| 140    | AGGAGATGCAGAAATCATAAATGCATT                                 |
| 141    | GAACAACCTGCACCATTGCAAGAATTGATTGATTTTCATAGGATTCTCT           |
| 142    | TTGATCCTTTTTTTATAACAGGAATTCAATATGATTAATTTTTATAAAAAGCAATAAAA |
| 143    | TTCAGAAATATAATTAACGTTTCAGCT                                 |
| 212    | ATGTCCCGGTTGCCAGCATCTTT                                     |
| 213    | GAACAACCTGCACCATTGCAAGATCTTCATAATTCAAGGATTGCATTGTT          |
| 214    | TTGATCCTTTTTTTATAACAGGAATTCAATCTGCTGGAAAAAGTGATACAATAA      |
| 215    | CGAAGTTTGTTAATGTACCGCCCA                                    |
| 721    | TGAATCCCGCACGACCAAAGCA                                      |
| 722    | ACATTGCCCCATAGTGAGTCGTAAAACCTGAAAAACAGAGTGACTGATA           |
| 723    | CCAGCTTTTGTTCCCTTTAGTGAGAAAACAAAGCTGCAAAAACGGCTG            |
| 724    | ATGCGTCAAAAGCCCTGCAATCA                                     |
| 740    | ATACCTACGCCTCGTTTAGAATTC                                    |
| 741    | CTCCTGTGACCCATAATAGTGTTGACATGTTTTTCA                        |
| 770    | AGGAGGGGATCCGGTTAACCGAATTCATAAAGAAATCG                      |
| 771    | CTCCTGTGCGACTGTAAGCTTATCTTGATCACGTCTC                       |
| 772    | AGGAGGTCGACGCAAGAGGCGGAGGGGATGATA                           |
| 773    | CTCCTGAATTCAGGAGGAAAAGCCTCTTTATCATCAG                       |
| 826    | AGGAGAATTCAGCCAATTCATTCAAATATATCGTTCT                       |
| 827    | CTCCTGGATCCGTCATATCTGTTTCATCTGCACAGC                        |
| 828    | AGGAGGGATCC TTAATGAGGAGGGCTTAATTTGATTC                      |
| 829    | CTCCTGTGCGACCTGGTGCGTTCAAATCCTTAGGG                         |
| 839    | AGGAGGTCGACGAAGAGCTCGTAAACAGTGAGGTC                         |
| 840    | CTCCTGGATCCTCCGCCTTCAGCAGCAAGATTTTTA                        |
| 857    | AGGAGGTCGACCGAGATAAAGGCCAAAATGTCATGT                        |
| 858    | CTCCTGGATCCTTGATAAGCCACGTTTATTCCTCATT                       |
| 859    | AGGAGGGATCCTTCAAGGCCATTAGGAGCGAATGT                         |
| 860    | CTCCTGAATTCGAAAACCTCCTGGCTACTTTTCATGT                       |
| 933    | AGGAGGCTCTCCGGTATGAAAATCAATCAATTTGGAACACAA                  |
| 934    | CTCCTCTCGAGGTTCAATAATTGCCTTCGCTGACAT                        |
| 976    | AGGAGGAATTCCAAAGGCTTTAAACGAATATACAGTAT                      |
| 977    | CTCCTGCATGCGGATAAATCTCTTGTGACATGCTG                         |
| 978    | AGGAGGCATGCAGCATTGGAGTGGTGGATATTTAAT                        |
| 979    | CTCCTGGATCCTATCAACAAACACATGATCATACTCA                       |
| 1135   | TCCTCGCATGCCCTTCGCTGACATGGGCTTTCTCC                         |
| 1387   | AGGAGGAATTCCTGGTTCTTAAAGAATTGGTCCCT                         |
| 1388   | CTCCTGTGACAGGTCCGGCTAATTC AAGCAGCT                          |
| 1389   | AGGAGCTCGAGGTGTCGATGGTTGAAATGGAGGAA                         |
| 1390   | CTCCTGGATCCTGATTCCAGAATAAAGTGAACGTAAC                       |
| 1479   | AGGAGGAATTCCTGTTGAGAACAGAGACCTGTTTCA                        |
| 1480   | CTCCTCTCGAGTTCAAGATTTTGTATCGTTCCAGAAA                       |
| 1481   | AGGAGCTCGAGTTTAATTCGCTGAAGACCGTATTAAC                       |
| 1482   | CTCCTGGATCCCTCACTCGTTTTGTTTTTCATTTGC                        |
| 1483   | AGGAGGAATTCATAGTAAATCAGGACTCCAAATGCT                        |
| 1484   | CTCCTCTCGAGCATACCGCTGATTCCAGAATAAAG                         |
| 1485   | AGGAGCTCGAGGATGAAATCCTTCAAGAAGTGGTTA                        |
| 1486   | CTCCTGGATCCACAGAAGTACAGATATGTGAATATA                        |
| 1569   | AGGAGGAATTCGGGATTGTTACTTTTGCCAACAG                          |
| 1570   | CTCCTGGATCCGAGAAGTCTCCTGACATTTCTCTC                         |
| 1571   | AGGAGGGATCCGGTGAACAAGATGGAGAATAATAGAT                       |
| 1572   | CTCCTGTGACCTCGATAATACTTCCGGCAGAAAAG                         |
| 1574   | GTGCGCTGCGGTTTTCTAAGGAT                                     |
| 1575   | CTCCTGGTACCTAATCTATTATTCTCCATCTTGTTCAC                      |
| 1576   | AGGAGGGTACCCGCATTAATAATTTAAAATAACGAAACAC                    |

|      |                                           |
|------|-------------------------------------------|
| 1577 | CTCCTGTCGACTACACCGACGACGAGCACACTTT        |
| 1692 | AGGAGGAATTCCTGATGATGAAATGCTGGTGAAAG       |
| 1693 | CTCCTCTCGAGCTTTTTCAACAGTCGTACACCCT        |
| 1694 | AGGAGCTCGAGTCTGAAGGAAAGAAGAAAGGCCCA       |
| 1695 | CTCCTGGATCCAATTGAATTCATCTCTACATTACCCT     |
| 1739 | AGGAGGAATTCGTGGATACTGATCGTGAT             |
| 1740 | CTCCTGTCGACTCTGTTTTTCGTTTTTTTCCTCA        |
| 1741 | AGGAGGTCGACAATGGAAAACTTAATATGAACACAGAAAAT |
| 1742 | CTCCTGGATCCGGTTTAAACGCATAATAAAAATTGA      |
| 1743 | CAAAGCGAATTCGTGTTGGA                      |
| 1744 | CTCCTGTCGACGTTTTGACCGAAGAACCTTTC          |
| 1745 | AGGAGGTCGACAAGCAGAAAGCGAATGATCCC          |
| 1746 | CTCCTGGATCCTCTCTCCCGCCAATTTGCTT           |
| 1747 | AGGAGGAATTCACAGAAAACACGAATGCAATCG         |
| 1748 | CTCCTGTCGACAGCAACAGACAATTTCTTACCT         |
| 1749 | AGGAGGTCGACGTTGAAGCAGCCTGGAATGC           |
| 1750 | CTCCTGGATCCATGATCAACCTCGAAAACCTG          |
| 1751 | CCTATGAATTCCTCCATTTTCTTCT                 |
| 1752 | CTCCTGTCGACCAAGCTGATCCACAATTTTTTG         |
| 1753 | AGGAGGTCGACGGAAAAGGGTTAATCAACGTAC         |
| 1754 | CTCCTGGATCCGTATATGAAGTGAACATGTCAG         |
| 1755 | AGGAGGAATTCATCTGCACAAATTCAGCGATC          |
| 1756 | CTCCTCTCGAGTACAACAAGTTTGCAAGACATG         |
| 1757 | AGGAGCTCGAGAAACGGCTGAACGCCGTCA            |
| 1758 | CTCCTGGATCCTAGGTATGGGTTGCTGCCAA           |
| 1759 | AGGAGGAATTCCTTGTGTGCTTAAACCATTGAT         |
| 1760 | CTCCTCTCGAGTTGTTTTCTGAATCTTGGAECTA        |
| 1761 | AGGAGCTCGAGTTCAACAATATTCAATATTGGGC        |
| 1762 | CTCCTGGATCCAGAATCAAAGACATCTTTCATCC        |
| 1763 | AGGAGGAATTCACATGTGACATCAGCTCCAAT          |
| 1764 | CTCCTCTCGAGAGCAAGGAAGCAAAAAGTTGTTG        |
| 1765 | AGGAGCTCGAGCACAACCGAGCTGAATTTTCT          |
| 1766 | CTCCTGGATCCACATTATTGCCACCGGTACG           |
| 1898 | AGGAGCTCGAGCTGGCCGAGGATTAGGAGGAATTA       |
| 1899 | CTCCTGGATCCTAAATGCAGAAGATAATTTTTGTTC      |
| 1900 | AGGAGGAATTCCTCAAAAATTACGGAGGATGATTC       |
| 1901 | CTCCTCTCGAGTTTCATTTGCATTAGAGTACGATT       |
| 2019 | AGGAGGAATTCAGCACCCCTCTGCATAAATCG          |
| 2020 | CTCCTCTCGAGCAAGTATTAATCTTTCTACGTC         |
| 2021 | AGGAGCTCGAGACGGCGCATTAAAGTCGTCAC          |
| 2022 | CTCCTGGATCCCTGAGGCTGTTGTTATAAAGGTTG       |
| 2029 | AGGAGGAATTCACAAAAGGCTATACACCTTCAG         |
| 2030 | CTCCTCTCGAGGAGGATAATGATAAGCAAAAACC        |
| 2031 | AGGAGCTCGAGGACATATTGGCGAAAATGACTC         |
| 2032 | CTCCTGGATCCTTCCAGAAACATCCGATGCAT          |
| 2033 | AGGAGGAATTCATGATCTCGGGAATGGCA             |
| 2034 | CTCCTCTCGAGGTTGTTTTTTCAGGCAGTTT           |
| 2035 | AGGAGCTCGAGACCGAGATCAGTCTGCGA             |
| 2036 | CTCCTGGATCCACAGCGGAGAAGCGATTACT           |
| 2037 | AGGAGGAATTCGTTCACTTTATTCTGGAATCAG         |
| 2038 | CTCCTCTCGAGCGCATTCAAGTAAAGGGCT            |
| 2039 | AGGAGCTCGAGATACAAATATTTGCAATGGATCAA       |
| 2040 | CTCCTGGATCCTGACTCGATCCATCATCGTAT          |
| 2041 | AGGAGGAATTCGACAGCTTATACAAGAGCAGG          |
| 2042 | CTCCTCTCGAGGATAAGAATAATTAGTAATATGATC      |
| 2043 | AGGAGCTCGAGCTCCAAGAAGGAAAAGTAGAAA         |

2044 CTCTGGATCCGGATACAGAGATTAATGACACC  
2103 AGGAGGAATTCCAATTGAACTTAGTAACGATT  
2104 CTCTCTCGAGTTCATTACCTAACTCTTTTCTGA  
2105 AGGAGCTCGAGATGACTAACGGCCAGAATGTG  
2106 CTCTGGATCCTAATCGAACTGGCTTAATGCAT  
2122 AAGGAGGAATTCTCCGCAGACGATGGCGTTA  
2123 CTCTCTCGAGACGCACCTCTTGTATAGAAAAG  
2124 AGGAGCTCGAGGTTGACACACAATTGATGCAAT  
2125 CTCTGGATCCTATCTCGGAAATACTCGGCAA  
2126 AGGAGGAATTCATTGAAGAAGCAAAGCCGAG  
2127 CTCTCTCGAGCATCAAGCCGATTACCCGC  
2128 AGGAGCTCGAGACAGACGAACCGGCTTTATTG  
2129 CTCTGGATCCTGCGATTAATAGAAACATCAGC  
2177 AGGAGGAATTCATTA AAAACCGGATGTTATTACTC  
2178 CTCTCTCGAGTGTGTAATGTTCTTTACTCTC  
2179 AGGAGCTCGAGACAAACGTCTTTGCAATTTCCG  
2180 CTCTGGATCCTAGAGCTGGAGTTTCGTCAA  
2185 AGGAGGAATTCAGAGTTTAAAATAGAAGATACAAG  
2186 CTCTCTCGAGATTGCCGACTTCCCGCAAAA  
2187 AGGAGCTCGAGCTGAAAGCGCATATGTTTATG  
2188 CTCTGGATCCTCGGCAGTCCGACAGAAATT  
2189 AGGAGGAATTCGGATCAAGCTTAATCTTAAAGG  
2190 CTCTCTCGAGGTCAGCAATCCCAACCTTTAT  
2191 AGGAGCTCGAGTTAGCGATAAAAAGAACAGCTGT  
2192 CTCTGGATCCTTTGTCATCTCTGATCATGACT  
2193 AGGAGGAATTCAGGACTTGACGTTGTA AAAAAC  
2194 CTCTCTCGAGATATTCTTTGCCATTTACCATAAA  
2195 AGGAGCTCGAGATTGATGCGAACGCGTTTTG  
2196 CTCTGGATCCTCGACAACAATGGCGTGTTT  
2197 AGGAGGAATTCAGCCTGAAGTTACATACGAAC  
2198 CTCTCTCGAGAAATGCTGCGTCATCTACAATTA  
2199 AGGAGCTCGAGCCTTTCCAGGCTGACCGTG  
2200 CTCTGGATCCTCAGCAGCTGGATCGTCTC  
2282 AGGAGGAATTCCTATTGAGCAGCATAACAGC  
2283 CTCTCTCGAGTCTCGCAGTTCCGATTACTTC  
2284 AGGAGCTCGAGCATGTGGAAGATATCGCAGC  
2285 CTCTGGATCCATTCCCAATCAGATGCTGAAC  
2286 AGAGGAATTCGCGATCGTCATTGTTCTGT  
2287 CTCTCTCGAGCGTTACGTATACGGCTTTTTT  
2288 AGGAGCTCGAGTCATTTACAACAGAGCTGTTTT  
2289 CTCTGGATCCCCTGACATTTGAAAAGCGA  
2290 AGGAGGAATTCGACTGTTGAAAAAGAGTCAAT  
2291 CTCTCTCGAGCGAACTTACGTTTTCCGGATC  
2292 AGGAGCTCGAGATGCTGCCTCCAGTTATGATT  
2293 CTCTGGATCCTGCTATTGAAAATCCCATTGAA  
2294 AGGAGGAATTCCTTATTTCTGCTTTTTTATTGGT  
2295 CTCTCTCGAGTTCTGTCTTCTCTCCCGCAA  
2296 AGGAGCTCGAGCTGGCTTACGTATATAAAAACAAA  
2297 CTCTGGATCCATGCAGCTTTGTGACCACA  
2317 AGGAGGAATTCGAAATTCTGCTATTTTCAGGCT  
2318 CTCTCTCGAGCTGAGCTGTTAAAGCCGATGC  
2319 AGGAGCTCGAGATGAATGCCACAAAGGGAATG  
2320 CTCTGGATCCCAAAGAATCAACCTGATCC  
2321 AGGAGGAATTCGAGATGACAGAATTGGCGCA  
2322 CTCTCTCGAGTTGAACCTGAAAAGGAGAAATTG  
2323 AGGAGCTCGAGGTGGAAGCTTATCAGGAGATT

|      |                                                 |
|------|-------------------------------------------------|
| 2324 | CTCCTGGATCCACGATTGATGCAGATGCTGC                 |
| 2325 | AGGAGGGATCCGTCTTGATGTCAATGGGAATG                |
| 2326 | CTCCTCTCGAGTCGATGTCCAAATAGCGGAAT                |
| 2327 | AGGAGCTCGAGGTTTTTCAGTTAACGATTGAAAC              |
| 2328 | CTCCTGAATTCAGCTCTACAATCGCCCTCAT                 |
| 2365 | AGGAGGAATTCAGATCACTCATCTTCCTAATTTGGC            |
| 2366 | CTCCTGGATCCCAAAGTCGCTTCAATTGTTCAATAA            |
| 3260 | GGCAACGGGAGCAGGTAC                              |
| 3261 | CAATTCGCCCTATAGTGAGTCGTCTGAAAATCAGTGCAAAAAATAAG |
| 3262 | CCCAGCTTTTGTTCCTTTAGTGAGTCACGGCTGTGGATACAGAT    |
| 3263 | AAGCCAGACTCAACATCTGC                            |
| 3330 | AGGAGGCTAGCTGCAACGGAAAGCGAGAGGAATCC             |
| 4190 | AGGAGGGATCCGGGCTTCGTAAAGAAGATTGGCTG             |
| 4191 | CTCCTGTCTGACTGTTGACATGTTTTTCACTCGCTAAC          |
| 4192 | AGGAGGTCGACCAGATACTTGAAGAGACGGAAAACA            |
| 4193 | CTCCTGAATTCTCCTCCGCTTAGGTCATTTTTGTA             |

**Supplemental Figure Legends**

**Figure S1. The  $\Delta 7$  protease mutant grows as single cells and swarms like wild-type *Bacillus subtilis*.** A) Florescence microscopy comparing WT (3610) and  $\Delta 7$  protease mutant (DS6329). Membranes are stained with FM-4-64 and are false-colored red. Scale bar, 4 $\mu$ m. B) Quantitative swarm assay for WT (open circles, 3610) and  $\Delta 7$  protease mutant (closed circles, DS6329).

Figure S1

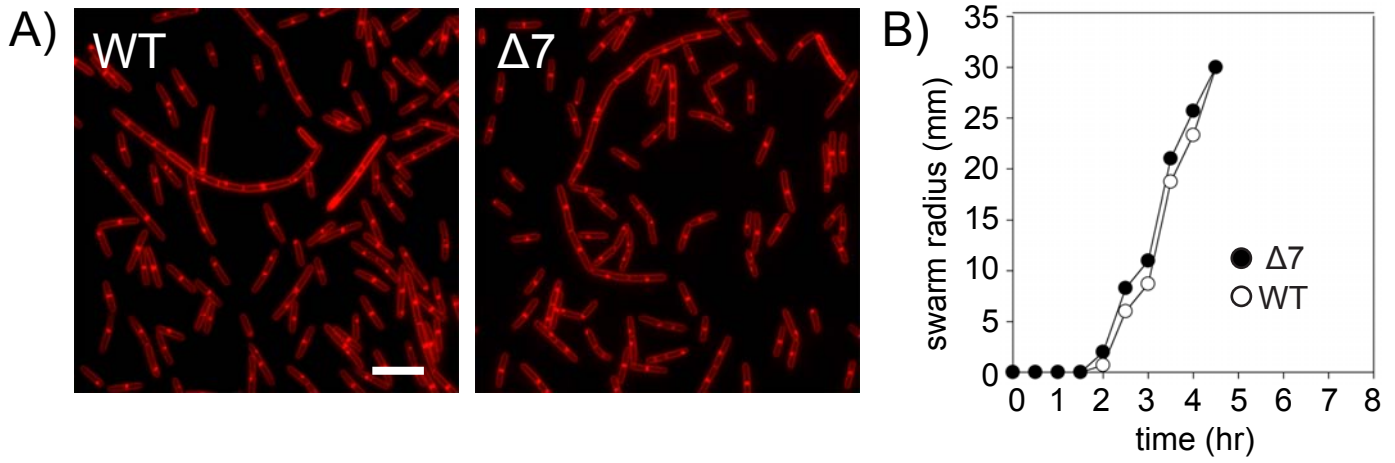

Supplement: JB.02324-14_zjb999093418so1.pdf [file JB.02324-14_zjb999093418so1.pdf]
